# Supplementary material
Source: publisher figshare collection journal article supplement (https://gsajournals.figshare.com/ndownloader/files/15512735)
Supplement: Supplementary file 1 [file 15512735]

## Sheet: Adipose-tissue
GO:0042611	MHC protein complex	6.8096e-14
GO:0071556	integral component of lumenal side of endoplasmic reticulum membrane	1.7024e-10
GO:0030666	endocytic vesicle membrane	1.09947e-08
GO:0030658	transport vesicle membrane	4.522e-07
GO:0032588	trans-Golgi network membrane	7.0224e-07
GO:0010008	endosome membrane	4.788e-05
GO:0005765	lysosomal membrane	0.001
GO:0042825	TAP complex	0.019
GO:0005839	proteasome core complex	0.026

## Sheet: Blood
GO:0042611	MHC protein complex	8.7703e-17
GO:0071556	integral component of lumenal side of endoplasmic reticulum membrane	1.0472e-12
GO:0012507	ER to Golgi transport vesicle membrane	8.29033e-09
GO:0030666	endocytic vesicle membrane	3.59975e-07
GO:0032588	trans-Golgi network membrane	0.0002435
GO:0010008	endosome membrane	0.01
GO:0042825	TAP complex	0.026

## Sheet: Blood-vessel
GO:0042613	MHC class II protein complex	1.5975e-14
GO:0071556	integral component of lumenal side of endoplasmic reticulum membrane	7.9875e-11
GO:0012507	ER to Golgi transport vesicle membrane	1.562e-08
GO:0030666	endocytic vesicle membrane	1.99688e-08
GO:0032588	trans-Golgi network membrane	4.26e-07
GO:0005765	lysosomal membrane	7.455e-07
GO:0010008	endosome membrane	0.0001369
GO:0042825	TAP complex	0.012

## Sheet: Brain
GO:0042611	MHC protein complex	2.4208e-15
GO:0071556	integral component of lumenal side of endoplasmic reticulum membrane	1.1392e-10
GO:0012507	ER to Golgi transport vesicle membrane	4.36693e-06
GO:0030669	clathrin-coated endocytic vesicle membrane	6.764e-06
GO:0032588	trans-Golgi network membrane	0.0003702
GO:0010008	endosome membrane	0.002
GO:0005765	lysosomal membrane	0.008
GO:0042825	TAP complex	0.02

## Sheet: Esophagus
GO:0042613	MHC class II protein complex	1.3312e-13
GO:0071556	integral component of lumenal side of endoplasmic reticulum membrane	1.7664e-06
GO:0005765	lysosomal membrane	1.7664e-06
GO:0030669	clathrin-coated endocytic vesicle membrane	1.7664e-06
GO:0032588	trans-Golgi network membrane	6.5536e-06
GO:0012507	ER to Golgi transport vesicle membrane	3.41333e-05
GO:0010008	endosome membrane	0.001
GO:0042825	TAP complex	0.009
GO:0005839	proteasome core complex	0.032
GO:0033116	endoplasmic reticulum-Golgi intermediate compartment membrane	0.032

## Sheet: Eye
GO:0042613	MHC class II protein complex	6.8442e-16
GO:0071556	integral component of lumenal side of endoplasmic reticulum membrane	1.71105e-09
GO:0030669	clathrin-coated endocytic vesicle membrane	2.35053e-08
GO:0012507	ER to Golgi transport vesicle membrane	5.44425e-08
GO:0032588	trans-Golgi network membrane	6.4294e-07
GO:0005765	lysosomal membrane	8.46883e-07
GO:0010008	endosome membrane	2.96286e-06
GO:0019774	proteasome core complex_ beta-subunit complex	0.01

## Sheet: Heart
GO:0042613	MHC class II protein complex	6.1464e-15
GO:0032588	trans-Golgi network membrane	1.4578e-07
GO:0071556	integral component of lumenal side of endoplasmic reticulum membrane	1.4578e-07
GO:0030669	clathrin-coated endocytic vesicle membrane	5.91e-07
GO:0012507	ER to Golgi transport vesicle membrane	3.3096e-06
GO:0005765	lysosomal membrane	7.289e-06
GO:0010008	endosome membrane	0.008

## Sheet: Large-intestine
GO:0042611	MHC protein complex	2.8625e-18
GO:0071556	integral component of lumenal side of endoplasmic reticulum membrane	1.88925e-14
GO:0012507	ER to Golgi transport vesicle membrane	1.10683e-10
GO:0030666	endocytic vesicle membrane	2.8625e-10
GO:0010008	endosome membrane	2.1984e-06
GO:0032588	trans-Golgi network membrane	4.77083e-06
GO:0005765	lysosomal membrane	6.21571e-05
GO:0042825	TAP complex	0.01
GO:0005793	endoplasmic reticulum-Golgi intermediate compartment	0.039

## Sheet: Lung
GO:0042613	MHC class II protein complex	3.3072e-15
GO:0071556	integral component of lumenal side of endoplasmic reticulum membrane	5.3424e-11
GO:0012507	ER to Golgi transport vesicle membrane	1.908e-07
GO:0030669	clathrin-coated endocytic vesicle membrane	2.7348e-06
GO:0032588	trans-Golgi network membrane	6.6144e-06
GO:0005765	lysosomal membrane	0.001
GO:0010008	endosome membrane	0.002
GO:0005839	proteasome core complex	0.005
GO:0042825	TAP complex	0.008

## Sheet: Meninx
GO:0042613	MHC class II protein complex	2.328e-14
GO:0071556	integral component of lumenal side of endoplasmic reticulum membrane	1.1058e-08
GO:0030669	clathrin-coated endocytic vesicle membrane	3.4532e-07
GO:0012507	ER to Golgi transport vesicle membrane	5.529e-06
GO:0032588	trans-Golgi network membrane	3.7248e-05
GO:0010008	endosome membrane	0.0003104
GO:0005765	lysosomal membrane	0.001
GO:0042825	TAP complex	0.013

[truncated: 8 more sheets: Salivary-gland, Skeletal-muscle, Small-intestine, Spleen, Thymus, Tonsil, Urinary-bladder, Vagina]
